# Supplementary material
Source: PubMed Central journal article supplement (PMC7966093)
Supplement: 2112_tables.pdf [file 2112_tables.pdf]

**On-line Table 1: Patients with acute hepatic encephalopathy: etiology, PAL, and outcomes**

| PAL (n1 10–35 μmol/L) Chronic Therapy |     |          |                          |                |                  |           |                        |                |                                                           |
|---------------------------------------|-----|----------|--------------------------|----------------|------------------|-----------|------------------------|----------------|-----------------------------------------------------------|
| No.                                   | Sex | Age (Yr) | Cause (West Haven Grade) | Maximal (±8 d) | Range (±30 days) | To ↓ PAL? | Sx Onset to MRI (days) | F-U MRI (days) | Outcome (Grade), Days to Maximal Improvement <sup>a</sup> |
| 1                                     | F   | 49       | AHF, NOS (3)             | 72 (0 d)       | 11–72            | No        | 3                      | Yes (8, 183)   | Resolved (0), 5                                           |
| 2                                     | F   | 55       | ACHF (3)                 | 18 (+4 d)      | 7–30             | Yes       | 4                      | No             | Resolved (0), 9                                           |
| 3                                     | F   | 38       | ACHF (3)                 | 161(+1 d)      | 79–161           | No        | 1                      | No             | Resolved (0), 5                                           |
| 4                                     | M   | 58       | ACHF (3)                 | 37 (0 d)       | 37–82            | No        | 0                      | No             | Resolved (0), 13                                          |
| 5                                     | F   | 69       | ACHF (1)                 | 58 (–1 d)      | 5–58             | No        | 4                      | No             | Resolved (0), 16                                          |
| 6                                     | M   | 22       | AHF, AOD (4)             | 80 (–7 d)      | 37–80            | No        | 18                     | No             | Resolved (0), 19                                          |
| 7                                     | F   | 42       | AHF, AOD (1)             | N/A            | N/A              | No        | 6                      | No             | Resolved (0), 18                                          |
| 8                                     | M   | 53       | ACHF (3)                 | 101 (0 d)      | 15–101           | No        | 5                      | No             | Minimal deficit (1), 16                                   |
| 9                                     | M   | 57       | ACHF (4)                 | 223(–6 d)      | 31–223           | No        | 5                      | Yes (16)       | Died at 35 (4)                                            |
| 10                                    | M   | 45       | ACHF (4)                 | 32 (+7 d)      | 12–123           | Yes       | 11                     | No             | Died at 31 (4)                                            |
| 11                                    | F   | 35       | AHF, AOD (3)             | 93 (–2 d)      | 20–93            | No        | 2                      | No             | Resolved (0), 13                                          |
| 12                                    | M   | 34       | AHF, AOD (2)             | 206(–8 d)      | 147–206          | No        | 10                     | Yes (20, 93)   | Mild deficit (2), 35                                      |
| 13                                    | F   | 44       | ACHF (2)                 | 73 (–1 d)      | 58–73            | No        | 2                      | No             | Resolved (0), 6                                           |
| 14                                    | F   | 10       | AHF, AOD, (4)            | 104 (0 d)      | 14–104           | No        | 2                      | Yes (5)        | Resolved (0), 13                                          |
| 15                                    | F   | 70       | ACHF (3)                 | 177 (0 d)      | 94–177           | No        | 0                      | No             | Moderate deficit (3), 3                                   |
| 16                                    | M   | 45       | ACHF (2),                | 34 (–3 d)      | 31–34            | Yes       | 17                     | No             | Resolved (0), 21                                          |
| 17                                    | F   | 43       | ACHF (3)                 | 89 (–1 d)      | 24–187           | Yes       | 1                      | Yes (81)       | Mild deficit (2), 4                                       |
| 18                                    | M   | 63       | ACHF (4)                 | 348 (0 d)      | 44–348           | No        | 6                      | No             | Died at 7 (4)                                             |
| 19                                    | M   | 45       | ACHF (4)                 | 280 (–5 d)     | 87–587           | No        | 5                      | No             | Died at 15 (4)                                            |
| 20                                    | M   | 46       | ACHF (2)                 | 61 (0 d)       | 61–150           | No        | 20                     | No             | Resolved (0), 27                                          |

<sup>a</sup>Number of days from symptom onset to maximal symptom improvement.

**On-line Table 2: Regions of involvement on FLAIR and DWI in patients with acute hepatic encephalopathy<sup>a</sup>**

| No. | Sex | Age (yr) | Sx to Initial, F-U MRI | Thalami FL/DWI | PLIC FL/DWI | PVWM FL/DWI | CWM FL/DWI | Brain Stem FL/DWI                            | DCI FL/DWI | GP T1 Bright | IPH |
|-----|-----|----------|------------------------|----------------|-------------|-------------|------------|----------------------------------------------|------------|--------------|-----|
| 1   | F   | 49       | 3 days                 | +/+            | +/+         | +/+         | -/-        | + / ±                                        | -/-        | -            | -   |
|     |     |          | F-U 8 days             | -/-            | +/+         | +/+         | -/-        | -/-                                          | -/-        | -            | -   |
|     |     |          | F-U 183 days           | -/-            | +/-         | +/-         | -/-        | -/-                                          | -/-        | -            | -   |
| 2   | F   | 55       | 4 days                 | -/-            | +/+         | +/+         | -/-        | -/-                                          | ±          | -            |     |
| 3   | F   | 38       | 1 day                  | -/+            | +/+         | +/-         | +/-        | + / ±                                        | -/-        | +            | +   |
| 4   | M   | 58 (0 d) | 0 days                 | -/-            | +/+         | +/+         | -/-        | -/-                                          | -/-        | +            | -   |
| 5   | F   | 69       | 4 days                 | +/+            | +/+         | +/+         | -/-        | +/+                                          | -/-        | +            | -   |
| 6   | M   | 22       | 18 days                | ±/-            | +/-         | +/+         | -/-        | -/-                                          | -/-        | -            | -   |
| 7   | F   | 42       | 6 days                 | +/+            | +/-         | +/±         | -/-        | +/-                                          | +/+        | -            | -   |
| 8   | M   | 53       | 5 days                 | +/+            | +/+         | +/+         | -/-        | +/+                                          | +/-        | +            | -   |
| 9   | M   | 57       | 5 days                 | +/+            | -/+         | -/+         | -/-        | +/-                                          | +/+        | +            | -   |
|     |     |          | F-U 16 days            | +/-            | -/+         | -/±         | -/-        | +/-                                          | +/+        | +            | -   |
| 10  | M   | 45       | 11 days                | +/+            | -/+         | +/±         | +/-        | + <sup>b</sup> / <sup>b</sup> + <sup>b</sup> | -/-        | ±            | -   |
| 11  | F   | 35       | 2 days                 | ±/+            | -/+         | -/+         | -/-        | ±/-                                          | -/-        | -            | -   |
| 12  | M   | 34       | 10 days                | +/+            | +/+         | -/-         | -/-        | -/-                                          | +/+        | -            | +   |
|     |     |          | F-U 20 days            | +/±            | +/+         | -/-         | -/-        | -/-                                          | +/+        | -            | +   |
|     |     |          | F-U 93 days            | -/-            | -/-         | -/-         | -/-        | -/-                                          | -/-        | -            | +   |
| 13  | F   | 44       | 2 days                 | +/+            | +/+         | +/+         | -/-        | +/+                                          | -/-        | +            | -   |
| 14  | F   | 10       | 2 days                 | +/+            | -/-         | -/-         | -/-        | +/+                                          | -/-        | -            | -   |
|     |     |          | F-U 5 days             | +/+            | -/-         | +/-         | -/-        | +/±                                          | -/-        | -            | +   |
| 15  | F   | 70       | 0 days                 | +/-            | -/+         | +/+         | -/-        | +/-                                          | -/-        | +            | -   |
| 16  | M   | 45       | 17 days                | +/-            | +/+         | +/+         | -/-        | -/-                                          | -/-        | +            | -   |
| 17  | F   | 43       | 1 day                  | +/+            | +/-         | +/+         | +/-        | +/-                                          | -/-        | +            | +   |
|     |     |          | F-U 81 days            | +/-            | +/+         | +/+         | -/-        | +/-                                          | -/-        | +            | +   |
| 18  | M   | 63       | 6 days                 | +/+            | +/+         | +/+         | -/-        | +/-                                          | +/+        | -            | -   |
| 19  | M   | 45       | 5 days                 | +/-            | +/+         | +/+         | -/-        | -/-                                          | +/+        | +            | -   |
| 20  | M   | 46       | 20 days                | +/+            | +/+         | +/+         | -/-        | -/-                                          | -/-        | +            | -   |

<sup>a</sup> + indicates involvement visualized; -, probable involvement; ±, probable improvement.

<sup>b</sup> Both ventral and DBS involvement.
